# Supplementary material
Source: publisher figshare collection journal article supplement (https://sage.figshare.com/ndownloader/files/22232076)
Supplement: Supplementary file 1 [file 22232076]

## Appendix A - Glossary of Mi'kmaw terms and place names

The spellings and translations of these Mi'kmaw words come from the community of Ewipkek on the south-western coast of Ktaqmkuk (see figure 1) and from Wetzel (1995).

|                        |                                                                                                                                                                                                                                                    |
|------------------------|----------------------------------------------------------------------------------------------------------------------------------------------------------------------------------------------------------------------------------------------------|
| <b>Elmastlukwek</b>    | Mi'kmaw place name for the Bay of Islands region of NL.                                                                                                                                                                                            |
| <b>Ewipkek</b>         | “calm waters” is the place name used to refer to Flat Bay.                                                                                                                                                                                         |
| <b>Ktaqmkuk</b>        | “the far shore where the waves cross-over” is the place name for the island of Newfoundland (Wetzel, 1995).                                                                                                                                        |
| <b>Miawpukek</b>       | translates to “middle river” and is the place name used for what is now called Conne River in Ktaqmkuk.                                                                                                                                            |
| <b>Mi'kma'ki</b>       | refers to the land traditionally inhabited by Mi'kmaq, including what is called today the Gaspé peninsula, New Brunswick, Nova Scotia, PEI, and Newfoundland and parts of Maine, USA.                                                              |
| <b>Mi'kmaq</b>         | coming from the word <i>nikmak</i> which means “my kin-friends”                                                                                                                                                                                    |
| <b>Msit No'kmaq</b>    | “all my relations”                                                                                                                                                                                                                                 |
| <b>No'kmaq Village</b> | the term used to refer to the Flat Bay Band Inc., the Mi'kmaq band meaning “connection” <sup>1</sup> . The No'kmaq Village Mi'kmaq live in the community of Ewipkek.                                                                               |
| <b>Nujio'qonik</b>     | “where the sand is blown up by the wind” is the term used to refer to Bay St. George in western Newfoundland                                                                                                                                       |
| <b>Pi'tawk'ewaq</b>    | Mi'kmaw term that roughly translates to “the people up river” or “up above” and used to refer to what the English have named the Beothuk. Typically, Mi'kmaq lived south of the Beothuk and thus referred to them with such a term (Wetzel, 1995). |
| <b>Qalipu</b>          | translates to “caribou” in the Mi'kmaw language and is the name used to refer to the Qalipu Mi'kmaq First Nation on the west coast of Ktaqmkuk                                                                                                     |
| <b>Sante' Mawi'omi</b> | Mi'kmaq Grand Council                                                                                                                                                                                                                              |
| <b>Unama'ki</b>        | place named used to refer to Cape Breton county and translates to “the land of fog” in the Mi'kmaw language.                                                                                                                                       |

---

<sup>1</sup> Ivan White, an important knowledge holder in Ewipkek and employee of No'kmaq Village explained that No'kmaq Village to him means that everything is connected, including the people, the land, the water, and the wildlife in Ewipkek.
